# Supplementary material for: Nanostructured fluids from degradable nonionic surfactants for the cleaning of works of art from polymer contaminants
Source: Royal Society of Chemistry journal article supplement (doi:10.1039/c4sm01084a), 2014-06-27
Supplement: c4sm01084a1.pdf [file c4sm01084a1.pdf]

## Supporting information

# Nanostructured Fluids from Degradable Nonionic Surfactants for the Cleaning of Works of Art from Polymer Contaminants

*Michele Baglioni<sup>a#</sup>, Martina Raudino<sup>a</sup>, Debora Berti<sup>a</sup>, U. Keiderling<sup>b</sup>, Romain Bordes<sup>c</sup>, Krister  
Holmberg<sup>\*c</sup>, Piero Baglioni<sup>\*a#</sup>.*

<sup>a</sup>Department of Chemistry and CSGI, University of Florence, via della Lastruccia 3, 50019, Sesto  
Fiorentino, Italy

<sup>b</sup>Helmholtz Zentrum Berlin, D-14109 Berlin, Germany

<sup>c</sup>Department of Chemical and Biological Engineering, Chalmers University of Technology,  
Göteborg, Sweden

\*Corresponding authors: Piero Baglioni; e-mail: [baglioni@csgi.unifi.it](mailto:baglioni@csgi.unifi.it), phone: +39 055 457 3033 -  
Krister Holmberg; e-mail: [krister.holmberg@chalmers.se](mailto:krister.holmberg@chalmers.se), phone: +46 31 772 2969

# No kinship exists among these authors.

**Table S1.** Viscosity (Pa·s) of D<sub>2</sub>O/MEK was measured as a function of temperature using a Ubbelohde viscosimeter immersed in a thermostatic bath. D<sub>2</sub>O has a viscosity of 1.11 Pa·s, while MEK has a viscosity of 0.80 Pa·s at 20 °C. The table reports the unusual behavior of the mixture: while the viscosity for a given MEK concentration decreases when temperature is raised, increasing MEK concentration results in a higher viscosity, which is unexpected in view of the viscosities of the two solvents alone.

| MEK concentration | 25°C   | 35°C   | 45°C   |
|-------------------|--------|--------|--------|
| 4                 | 0.9393 | 0.744  | 0.6049 |
| 8                 | 1.0413 | 0.8006 | 0.6469 |
| 13.5              | 1.3737 | 1.0404 | 0.7659 |
| 20                | 1.3134 | 0.9941 | 0.7783 |

**Table S2.** Molecular properties of the chemicals used in SANS experiments. The alkyl portion of the two surfactants was considered as composed of 10 C atoms on average, while no distinction was taken into account between the 5.5 EO groups of NR and the 6 EO groups of BR.

| Compound    | Formula                                                                                 | Molecular mass (g/mol) | SLD ( $10^{-6} \text{ \AA}^{-2}$ ) |
|-------------|-----------------------------------------------------------------------------------------|------------------------|------------------------------------|
| Heavy water | D <sub>2</sub> O                                                                        | 20.04                  | 6.39                               |
| BR          | C <sub>10</sub> H <sub>21</sub> (CH <sub>2</sub> CH <sub>2</sub> O) <sub>6</sub> O<br>H | 422.6                  | 0.37                               |
| BR tail     | C <sub>10</sub> H <sub>21</sub>                                                         | 141.2                  | -0.41                              |
| BR head     | (CH <sub>2</sub> CH <sub>2</sub> O) <sub>6</sub> OH                                     | 281.4                  | 0.97                               |
| MEK         | (C <sub>2</sub> H <sub>5</sub> )CO(CH <sub>3</sub> )                                    | 72.11                  | 0.17                               |

**Table S3.** SANS fitting parameters for the BR-based systems.

| Fitting parameter                       | BR – MEK<br>0%       | BR – MEK<br>4%       | BR – MEK<br>8%       | BR – MEK<br>13.5%    | BR – MEK<br>20%      |
|-----------------------------------------|----------------------|----------------------|----------------------|----------------------|----------------------|
| $\phi$                                  | 0.051                | 0.048                | 0.045                | 0.043                | 0.049                |
| r (Å)                                   | 16.6                 | 15.6                 | 15.5                 | 14.4                 | 14.1                 |
| poly                                    | 0.39                 | 0.38                 | 0.36                 | 0.38                 | 0.40                 |
| t (Å)                                   | 7.7                  | 8.0                  | 6.1                  | 4.7                  | 4.5                  |
| SLD <sub>core</sub> (Å <sup>-2</sup> )  | $-4.1 \cdot 10^{-7}$ | $-4.1 \cdot 10^{-7}$ | $-4.1 \cdot 10^{-7}$ | $-4.1 \cdot 10^{-7}$ | $-2.8 \cdot 10^{-7}$ |
| SLD <sub>shell</sub> (Å <sup>-2</sup> ) | $3.1 \cdot 10^{-6}$  | $3.5 \cdot 10^{-6}$  | $2.2 \cdot 10^{-6}$  | $1.0 \cdot 10^{-6}$  | $9.1 \cdot 10^{-7}$  |
| SLD <sub>bulk</sub> (Å <sup>-2</sup> )  | $6.4 \cdot 10^{-6}$  | $6.0 \cdot 10^{-6}$  | $5.7 \cdot 10^{-6}$  | $5.3 \cdot 10^{-6}$  | $4.9 \cdot 10^{-6}$  |
| K <sub>1</sub>                          | 6.7                  | 5.5                  | 6.5                  | 6.5                  | 10.5                 |
| Z <sub>1</sub>                          | 31.0                 | 34.7                 | 34.8                 | 34.8                 | 25.4                 |
| K <sub>2</sub>                          | -1.3                 | -0.9                 | -1.7                 | -1.7                 | -0.5                 |
| Z <sub>2</sub>                          | 11.7                 | 4.0                  | 3.9                  | 3.9                  | 2.3                  |
| N <sub>w</sub>                          | 8.5                  | 12.1                 | 3.9                  | 0.1                  | 0.3                  |
| N <sub>agg</sub>                        | 62                   | 51                   | 50                   | 40                   | 30                   |

**Table S4.** SANS fitting parameters for the NR-based systems.

| Fitting parameter                       | NR – MEK<br>0%       | NR – MEK<br>4%       | NR – MEK<br>8%       | NR – MEK<br>13.5%    | NR – MEK<br>20%      |
|-----------------------------------------|----------------------|----------------------|----------------------|----------------------|----------------------|
| $\phi$                                  | 0.051                | 0.048                | 0.045                | 0.042                | 0.038                |
| a (Å)                                   | 489.9                | -                    | -                    | -                    | 317.4                |
| b (Å)                                   | 14.4                 | -                    | -                    | -                    | 17.3                 |
| r (Å)                                   | -                    | 15.9                 | 16.8                 | 16.2                 | -                    |
| poly                                    | -                    | 0.47                 | 0.44                 | 0.46                 | -                    |
| t (Å)                                   | 14.5                 | 8.3                  | 7.6                  | 6.2                  | 15.9                 |
| SLD <sub>core</sub> (Å <sup>-2</sup> )  | $-4.1 \cdot 10^{-7}$ | $-4.1 \cdot 10^{-7}$ | $-4.1 \cdot 10^{-7}$ | $-4.1 \cdot 10^{-7}$ | $-2.1 \cdot 10^{-7}$ |
| SLD <sub>shell</sub> (Å <sup>-2</sup> ) | $4.1 \cdot 10^{-6}$  | $3.6 \cdot 10^{-6}$  | $2.9 \cdot 10^{-6}$  | $2.1 \cdot 10^{-6}$  | $4.0 \cdot 10^{-6}$  |
| SLD <sub>bulk</sub> (Å <sup>-2</sup> )  | $6.4 \cdot 10^{-6}$  | $6.0 \cdot 10^{-6}$  | $5.7 \cdot 10^{-6}$  | $5.3 \cdot 10^{-6}$  | $4.9 \cdot 10^{-6}$  |
| K <sub>1</sub>                          | 4.2                  | 21.1                 | 20.2                 | 20.2                 | 10.0                 |
| Z <sub>1</sub>                          | 36                   | 25.1                 | 25.1                 | 25.1                 | 35.6                 |
| K <sub>2</sub>                          | -1.3                 | -2.2                 | -4.1                 | -4.0                 | -3.3                 |
| Z <sub>2</sub>                          | 9.0                  | 20.0                 | 20.0                 | 20.0                 | 9.0                  |
| N <sub>w</sub>                          | 18.9                 | 12.8                 | 7.7                  | 3.6                  | 25.5                 |
| N <sub>agg</sub>                        | 1367                 | 54                   | 64                   | 57                   | 857                  |
